# Supplementary material for: Knowledge Production on Congenital Chagas Disease across Time, Borders and Disciplines: A Comprehensive Scoping Review
Source: MDPI journal article supplement (doi:10.3390/tropicalmed8090422), 2023-08-22
Supplement: s1 [file s1]

**Table S1.** Databases and Equations used in Literature Search**Knowledge Production on Congenital Chagas Disease across Time, Borders and Disciplines: A Comprehensive Scoping Review**

E.Rapp; M. Gold 2023

| Data sources                | Query                                                                                                                                                                                                                                                                                                                                                                                                                                                                                                                                                                                                                    |
|-----------------------------|--------------------------------------------------------------------------------------------------------------------------------------------------------------------------------------------------------------------------------------------------------------------------------------------------------------------------------------------------------------------------------------------------------------------------------------------------------------------------------------------------------------------------------------------------------------------------------------------------------------------------|
| BIBLIOTECA VIRTUAL EN SALUD | Search by title : (cruzi OR chagas OR Trypanosom*) AND (prenatal OR ginecología OR embarazo OR embarazada OR madre OR congénito OR transplacentaria OR bebé OR bebés OR recién nacido OR neonat* OR feto OR pediátric* OR pré-natal OR ginecologia OR gravidez OR grávida OR mãe OR congénita OR transplacentar OR criança OR crianças OR recém-nascido OR fetus OR gynecology OR pregnancy OR pregnant OR mother* OR congenital OR infant OR infants OR newborn* OR baby OR babies OR fetus OR pediatric* OR paediatric*)                                                                                               |
| BIBNET.ORG                  | (cruzi OR chagas OR Trypanosom*) AND (pränatal OR Gynäkologie OR Schwangerschaft OR schwanger OR Mutter OR kongenital OR transplazentar OR Säugling OR Neugeborene* OR Baby OR Kleinkinder OR Kinder OR Neonat* OR Fötus OR Pädiatrie OR prenatal OR gynecology OR pregnancy OR pregnant OR mother* OR congenital OR transplacentar OR infant OR infants OR newborn* OR baby OR babies OR neonat* OR fetus OR pediatric* OR paediatric*)                                                                                                                                                                                 |
| CINAHL                      | (MH "Trypanosomiasis" OR cruzi OR chagas OR Trypanosom*) AND (MH "Infant, Newborn, Diseases+" OR MH "Disease Transmission, Vertical" OR OR prenatal OR gynecology OR pregnancy OR pregnant OR mother* OR congenital OR transplacentar OR infant OR infants OR newborn* OR baby OR babies OR neonat* OR fetus OR pediatric* OR paediatric*)                                                                                                                                                                                                                                                                               |
| EMBASE                      | ('congenital chagas disease'/deOR (('chagas disease'/exp OR 'trypanosoma cruzi'/de OR 'trypanosomiasis'/de OR cruzi:ab,ti,kw OR chagas:ab,ti,kw OR trypanosom*:ab,ti,kw) AND ('congenital disorder'/lnk OR 'congenital infection'/de OR 'vertical transmission'/exp OR prenatal:ab,ti,kw OR gynecology:ab,ti,kw OR pregnancy:ab,ti,kw OR pregnant:ab,ti,kw OR mother*:ab,ti,kw OR congenital:ab,ti,kw OR transplacentar:ab,ti,kw OR infant:ab,ti,kw OR infants:ab,ti,kw OR newborn*:ab,ti,kw OR baby:ab,ti,kw OR babies:ab,ti,kw OR neonat*:ab,ti,kw OR fetus:ab,ti,kw OR pediatric*:ab,ti,kw OR paediatric*:ab,ti,kw))) |
| IBSS                        | (cruzi OR chagas OR Trypanosom*) AND (prenatal OR gynecology OR pregnancy OR pregnant OR mother* OR congenital OR transplacentar OR infant OR infants OR newborn* OR baby OR babies OR neonat* OR fetus OR pediatric* OR paediatric*)                                                                                                                                                                                                                                                                                                                                                                                    |
| JSTOR                       | (cruzi OR chagas OR Trypanosom*) AND (prenatal OR gynecology OR pregnancy OR pregnant OR mother* OR congenital OR transplacentar OR infant OR infants OR newborn* OR baby OR babies OR neonat* OR fetus OR pediatric* OR paediatric*)                                                                                                                                                                                                                                                                                                                                                                                    |
| MEDES                       | (cruzi[título] OR cruzi[resumen] OR cruzi[palabras_clave]) AND (chagas[título] OR chagas[resumen] OR chagas[palabras_clave]) AND (tripanosom[título] OR tripanosom[resumen] OR tripanosom[palabras_clave])                                                                                                                                                                                                                                                                                                                                                                                                               |

**Table S1.** Databases and Equations used in Literature Search**Knowledge Production on Congenital Chagas Disease across Time, Borders and Disciplines: A Comprehensive Scoping Review**

E.Rapp; M. Gold 2023

|                                |                                                                                                                                                                                                                                                                                                                                                                                                                                                                                                                                                                                                                                                                                   |
|--------------------------------|-----------------------------------------------------------------------------------------------------------------------------------------------------------------------------------------------------------------------------------------------------------------------------------------------------------------------------------------------------------------------------------------------------------------------------------------------------------------------------------------------------------------------------------------------------------------------------------------------------------------------------------------------------------------------------------|
| PUBMED                         | ("Chagas Disease"[Mesh] OR "Trypanosoma cruzi"[Mesh] OR "Trypanosomiasis"[Mesh:NoExp] OR cruzi[tiab] OR chagas[tiab] OR Trypanosom*[tiab])<br>AND<br>("congenital"[Subheading] OR "Infant, Newborn, Diseases"[Mesh] OR "Infectious Disease Transmission, Vertical"[Mesh] OR prenatal[tiab] OR gynecology[tiab] OR pregnancy[tiab] OR pregnant[tiab] OR mother*[tiab] OR congenital[tiab] OR transplacental[tiab] OR infant[tiab] OR infants[tiab] OR newborn*[tiab] OR baby[tiab] OR babies[tiab] OR neonat*[tiab] OR fetus[tiab] OR pediatric*[tiab] OR paediatric*[tiab])                                                                                                       |
| PSYCINFO                       | (cruzi OR chagas OR Trypanosom*) AND (prenatal OR gynecology OR pregnancy OR pregnant OR mother* OR congenital OR transplacental OR infant OR infants OR newborn* OR baby OR babies OR neonat* OR fetus OR pediatric* OR paediatric*)                                                                                                                                                                                                                                                                                                                                                                                                                                             |
| SCIELO                         | (cruzi OR chagas OR Trypanosom*) AND (prenatal OR ginecología OR embarazo OR embarazada OR madre OR congénito OR transplacentaria OR bebé OR bebés OR recién nacido OR neonat* OR feto OR pediátric*)<br><br>(cruzi OR chagas OR Trypanosom*) AND (pré-natal OR ginecologia OR gravidez OR grávida OR mãe OR congénita OR transplacental OR criança OR crianças OR bebé OR bebés OR recém-nascido OR neonat* OR fetus OR pediátrica)<br><br>(cruzi OR chagas OR Trypanosom*) AND (prenatal OR gynecology OR pregnancy OR pregnant OR mother* OR congenital OR transplacental OR infant OR infants OR newborn* OR baby OR babies OR neonat* OR fetus OR pediatric* OR paediatric*) |
| SOCIOLOGICAL ABSTRACT          | (cruzi OR chagas OR Trypanosom*) AND (prenatal OR gynecology OR pregnancy OR pregnant OR mother* OR congenital OR transplacental OR infant OR infants OR newborn* OR baby OR babies OR neonat* OR fetus OR pediatric* OR paediatric*)                                                                                                                                                                                                                                                                                                                                                                                                                                             |
| TESEO                          | Search by title : (Chagas OR trypanosom OR cruzi)                                                                                                                                                                                                                                                                                                                                                                                                                                                                                                                                                                                                                                 |
| WEB OF SCIENCE CORE COLLECTION | TS=("cruzi" OR "chagas" OR Trypanosom*)<br>AND<br>TS=("prenatal" OR "gynecology" OR "pregnancy" OR "pregnant" OR mother* OR "congenital" OR "transplacental" OR "infant" OR "infants" OR newborn* OR "baby" OR "babies" OR neonat* OR "fetus" OR pediatric* OR paediatric*)                                                                                                                                                                                                                                                                                                                                                                                                       |
| GOOGLESCHOLAR                  | Keywords : (chagas OR cruzi OR trypano*) AND (congenital OR pregnan*)<br><br>Language selected: English, French, German, Portuguese and Spanish<br><br>Time selection (3) : No time limit; Since 2018; Since 2022. For each time selection the first 1000 sources were screened.                                                                                                                                                                                                                                                                                                                                                                                                  |

Note: In the Bibnet.org database, the Medline category has been removed.
